# Supplementary material for: Thermoplastic Starch Composites Reinforced with Functionalized POSS: Fabrication, Characterization, and Evolution of Mechanical, Thermal and Biological Activities
Source: MDPI journal article supplement (doi:10.3390/antibiotics11101425), 2022-10-17
Supplement: s1 [file s1]

## Supplementary data

**Table S1.** Thermogravimetric analysis of TS and TS/*fn*-POSS nanocomposite films.

| Samples | Initial Degradation Temperature, °C | Second Degradation Temperature, °C | Final Degradation Temperature, °C | Ash Content (%) |
|---------|-------------------------------------|------------------------------------|-----------------------------------|-----------------|
| TSP-0.0 | 220.51                              | 382.10                             | 395.35                            | 6.20            |
| TSP-0.5 | 225.60                              | 390.25                             | 401.50                            | 5.91            |
| TSP-1.0 | 247.92                              | 406.82                             | 414.15                            | 5.85            |
| TSP-3.0 | 275.65                              | 427.35                             | 435.82                            | 5.24            |
| TSP-5.0 | 350.58                              | 460.54                             | 469.50                            | 4.75            |

**Table S2.** Values of thickness, water solubility (WS), water vapor transmission rate (WVTR), oxygen transmission rate (OTR) and water contact angle (WCA) of the TS and TS/*fn*-POSS nanocomposite samples.

| Properties                    | TS/ <i>fn</i> -POSS Nanocomposite Samples |                        |                        |                        |                        |
|-------------------------------|-------------------------------------------|------------------------|------------------------|------------------------|------------------------|
|                               | TSP-0.0                                   | TSP-0.5                | TSP-1.0                | TSP-3.0                | TSP-5.0                |
| Thickness (μm)                | 54 ± 0.02 <sup>a</sup>                    | 59 ± 0.03 <sup>b</sup> | 65 ± 0.07 <sup>b</sup> | 78 ± 0.10 <sup>a</sup> | 91 ± 0.05 <sup>c</sup> |
| Water solubility (%)          | 78.20                                     | 70.55                  | 59.85                  | 37.35                  | 25.11                  |
| WVTR (g/m <sup>2</sup> /day)  | 72.4                                      | 69.0                   | 64.9                   | 50.8                   | 48.1                   |
| OTR (cc/m <sup>2</sup> /24 h) | 140.2                                     | 128.9                  | 107.1                  | 78.3                   | 51.8                   |
| WCA <sup>o</sup> (%)          | 56.4                                      | 57.8                   | 60.5                   | 64.1                   | 76.3                   |

Note: Values with the same superscript letter in the same row indicate that they are not statistically different ( $p < 0.05$ ). The values are presented as mean ± SD.

**Table S3.** Antimicrobial activity of TS/*fn*-POSS nanocomposites against *S. aureus* and *E. coli*.

| Strain           | Zone of Inhibition in (mm) |         |         |         |         |
|------------------|----------------------------|---------|---------|---------|---------|
|                  | TSP-0.0                    | TSP-0.5 | TSP-1.0 | TSP-3.0 | TSP-5.0 |
| <i>S. aureus</i> | 11.0                       | 11.9    | 13.7    | 13.9    | 15.0    |
| <i>E. coli</i>   | 11.0                       | 11.3    | 13.2    | 13.7    | 14.8    |
